# Supplementary material
Source: Elsevier journal article supplement (https://www.sciencedirect.com/science/article/pii/S0211699519300037)
Supplement: mmc1 [file S0211699519300037:mmc1.docx]

Tabla suplementaria. Evidencia científica de la carga ácida de la dieta como determinante de complicaciones metabólicas

|  | Autor, año | Metodología | Resultado | Conclusión |
| --- | --- | --- | --- | --- |
| Sarcopenia | Welch AA et al. 2012. [22] | Estudio transversal.  Evaluación dietética (CFC de 131 alimentos) y de composición corporal (DXA).  Cálculo de PRAL. | Se incluyeron a 2 689 mujeres.  Mayor masa libre de grasa en kg y % de índice de masa libre de grasa en el grupo con menor PRAL (C1 vs C4) (ajustado a edad, actividad física, tabaquismo y consumo de proteínas). | Posible efecto de dieta con baja carga ácida (PRAL negativo) en la preservación de la masa muscular en mujeres. |
| Chan R, et al. 2015. [23] | Cohorte prospectiva.  Evaluación dietética CFC semi-cuantitativa) y de composición corporal (DXA). Medición basal con seguimiento a 4 años.  Cálculo de NEAPestimado. | 3 122 pacientes fueron incluidos (49.7% hombres)  Mayor pérdida de masa muscular apendicular esquelética (p=0.026) en grupo con mayor NEAPestimado (C4 vs C1) (ajustado a edad, IMC, tabaquismo, alcoholismo, número de enfermedades crónicas). | Posible efecto de dieta con baja carga ácida (NEAPestimado negativo) en la prevención de la pérdida muscular en mujeres mayores. |
| Faure AM, et al. 2017  [24] | Estudio transversal.  Evaluación dietética (CFC de 110 alimentos) y de composición corporal (DXA).  Cálculo de PRAL. | Se incluyeron 117 hombres y 130 mujeres mayores de 60 años.  Menor musculatura en mujeres menores de 70 años con mayor PRAL (C4 vs C1) pero no en hombres. | La dieta con baja carga ácida (PRAL negativo) puede proveer beneficios en la preservación de la masa muscular en mujeres. |
| Kataya Y, et al. 2017  [25] | Estudio transversal.  Evaluación dietética (CFC de 58 alimentos) y de fragilidad (autoinforme de agotamiento y/o fatiga, lentitud en la velocidad de la marcha, pérdida de peso involuntaria y bajo nivel de actividad física).  Cálculo de NEAPestimado y PRAL. | Se incluyeron 2 176 mujeres de 65-94 años.  Mayor riesgo de fragilidad en pacientes con dietas altas en NEAPestimado (Q5 vs Q1)(OR 1.42, IC95% 0.98-2.06, p=0.03) y PRAL (OR 1.59, IC95% 1.08-2.34, p=0.048) (ajustado a edad, IMC, educación, tabaquismo, alcoholismo, uso de suplementos nutricionales, historial de enfermedades crónicas, entre otros). | Dietas con carga acida elevada (PRAL y NEAPestimado elevados) se asocian a una mayor prevalencia de fragilidad, particularmente a autoinforme de agotamiento y/o fatiga y bajo nivel de actividad física en mujeres japonesas. |
| Baja densidad mineral ósea/ Osteoporosis | Alexy U, et al. 2005  [28] | Cohorte prospectiva.  Evaluación dietética (diario de 3 días, uno al año durante 4 años) y de hueso medida a través de tomografía computarizada cuantitativa periférica.  Cálculo de PRAL. | Se incluyeron 229 niños y adolescentes de 6-18 años.  Tras cuatro años de seguimiento, se observó una menor área cortical (R2=0.03, p=0.0082) y contenido mineral óseo (R2=0.03, p=0.0058) en pacientes con dietas altas en PRAL (ajustado a edad, consumo energético y sexo). | Dietas con carga ácida elevada (PRAL elevado) disminuyen la formación de huesos en niños y adolescentes. |
| Remer T, et al. 2011  [29] | Cohorte prospectiva.  Recolección de orina de 24 hrs para cuantificación de NEAPdirecto y PRALurinario. Evaluación de hueso medido por tomografía computarizada cuantitativa periférica. | Se incluyeron 197 niños y 98 adolescentes.  Relación inversa entre PRALurinario  y contenido mineral óseo (β=-0.02, p=0.03) así como área cortical (β=-0.02, p=0.03) (ajustado a edad, sexo, etapa de Tanner, excreción urinaria de calcio, entre otros). | Dietas con carga ácida elevada (PRALurinario,elevado)se asocian con un menor anabolismo óseo. |
| Jia T, et al. 2014  [31] | Cohorte prospectiva.  Evaluación dietética (diario de 7 días) y densidad mineral ósea (DXA). Seguimiento para evaluar incidencia de fracturas.  Cálculo de NEAPestimado y PRAL. | Se incluyeron 861 adultos mayores de 70 años.  Sin diferencias en DMO y tiempo de fractura en Q1 vs Q5 de NEAPestimado (OR 1.03, IC95% 0.57-1.85, p=0.63) y PRAL (OR 0.93, IC95% 0.55-1.55, p=0.66). | La carga ácida de la dieta no se asocia con la densidad mineral ósea ni tiene un impacto en el riesgo de fracturas en adultos mayores. |
| Esche J, et al. 2016  [30] | Cohorte prospectiva.  Recolección de orina de 24 hrs para cuantificación de citrato urinario y PRALurinario. Evaluación de hueso medido por tomografía computarizada cuantitativa periférica. Seguimiento durante 4 años. | Se incluyeron a 231 niños sanos entre 6 y 18 años.  Se detectó una relación inversa entre PRALurinario y contenido mineral óseo (β=-0.02, p=0.043) y área cortical (β=-0.02, p=0.046). PRAL elevado se asocia con mayor riesgo de fracturas en mujeres (OR 2.53, IC95% 1.02-6.28, p=0.46), pero no en hombres (OR 1.63, IC95% 0.64-4.17, p=0.31). | Dietas con carga ácida elevada (PRALurinario elevado) tiene efectos adversos en la salud ósea. |
| Jonge EAL, et al.  2017  [32] | Estudio transversal.  Evaluación dietética (CFC de 389 alimentos), densidad mineral ósea (DXA) y microestructura ósea (trabecular bone score-TBS-).  Cálculo de NEAPestimado. | Se analizaron a 4 672 adultos mayores de 45 años.  Relación inversa entre NEAPestimado y resultado de TBS (β = -0.04, IC95%= -0.07, -0.01, p<0.05). No se detectó relación entre NEAP y densidad mineral ósea. | Dietas con carga ácida elevada (NEAPestimado elevado) pueden tener efectos deletéreos en la microestructura ósea. |
| Ácido Úrico | Esche J, et al.  2018  [34] | Estudio transversal.  Evaluación dietética (CFC de 53 alimentos) y bioquímica (ácido úrico).  Estimación de PRAL. | Se incluyeron 6 894 pacientes de 18 a 79 años.  Individuos con PRAL bajo (T1 vs T3) tienen menor prevalencia de hiperuricemia (OR 0.60, IC95% 0.43-0.83, p<0.05) (ajustado a edad, IMC, sexo, función renal, actividad física, entre otros). | Dietas con carga ácida baja (PRAL negativo) se asocian con menor prevalencia de hiperuricemia. |
| Hipertensión | Zhang L, et al.  2009  [36] | Cohorte prospectiva.  Evaluación dietética (CFC). Diagnóstico de hipertensión.  Seguimiento durante 14 años.  Cálculo de NEAPestimado. | Se incluyeron 87 293 mujeres.  Se observaron mayor incidencia de hipertensión en el grupo con mayor NEAPestimado (D10 vs D1) (OR 1.23, IC95% 1.08-1.41, p=0.01) (ajustado a consumo de sodio, magnesio, proteína, potasio, edad, IMC, actividad física, tabaquismo, consumo de alcohol, entre otros). | Dietas con carga ácida elevada (NEAPestimado elevado) se asocian a mayor riesgo de incidencia de hipertensión. |
| Engberink M, et al.  2012  [37] | Cohorte prospectiva.  Evaluación dietética (CFC de 170 alimentos). Evaluación de la presión arterial.  Se estimó PRAL y NEAPestimado.  Seguimiento durante 6 años. | Se incluyeron 2 241 adultos mayores de 55 años sin diagnóstico de hipertensión.  No se observó una relación entre riesgo de hipertensión y tertiles de PRAL (OR 1.02, IC95% 0.88-1.18, p=1.0) o NEAPestimado (OR 0.94, IC95% 0.81-1.10, p=0.46). | La carga acida de la dieta, evaluada a través del PRAL o el NEAPestimado no se relaciona con el riesgo de hipertensión. |
| Krupp D, et al.  2013  [33] | Cohorte prospectiva.  Evaluación dietética (diario de 3 días), recolección de orina de 24 horas para cuantificación de PRALurinario y de NEAPdirecto.  Estimación de PRAL en dieta.  Seguimiento durante 10 años. | Se incluyeron a 257 niños de 5 a 10 años de edad. El PRALurinario, pero no el dietético, se asocia con mayores cifras de tensión arterial sistólica (β= 0.083, p=0.036) y diastólica (β = 0.106, p=0.003) (ajustado a la edad, sexo e IMC, entre otros). | Dietas con carga acida elevada, evaluadas a través del PRALurinario, se asocian con mayores cifras de tensión arterial en niños normotensos. |
| Akter S, et al. 2015.  [38] | Estudio transversal.  Evaluación dietética (CFC de 56 alimentos) y de tensión arterial.  Cálculo de NEAPestimado y PRAL. | Se incluyeron 2 028 adultos de 18 a 70 años. Se observó un mayor riesgo de hipertensión en los individuos con mayor PRAL (T3 vs T1) (OR 1.31, IC95% 1.01-1.70, p=0.043), el cual no mostró significancia estadística tras ajustarse al IMC, consumo de sodio, actividad física, tabaquismo y otros posibles confusores (OR 1.23, IC95% 0.87-1.72, p=0.27). | Dietas con carga ácida elevada (PRAL elevado) pueden asociarse a una mayor prevalencia de hipertensión. |
| Tielemans MJ, et al.  2018  [40] | Cohorte prospectiva.  Evaluación dietética (CFC de 290 alimentos) y de tensión arterial. Diagnóstico de eclampsia o hipertensión inducida por el embarazo.  Cálculo de PRAL y NEAPestimado. | Se incluyeron a 3 411 mujeres embarazadas. No observaron asociaciones entre PRAL (OR 1.08, IC95% 0.93-1.27, p>0.05) y NEAPestimado (OR 1.06, IC95% 0.91-1.23, p>0.05) con el desarrollo de hipertensión inducida por el embarazo ni eclampsia (OR 1.06, IC95% 0.81-1.37 para PRAL y OR 1.08, IC95% 0.84-1.39 para NEAPestimado). | Dietas con carga ácida elevada, evaluadas con PRAL y NEAPestimado, no se asocian con el desarrollo de alteraciones en la tensión arterial durante el embarazo. |
| Krupp D, et al. 2018  [39] | Estudio transversal.  Evaluación dietética (CFC 53 alimentos) y de tensión arterial.  Cálculo de PRAL. | Se incluyeron 6 788 adultos de 18-79 años.  PRAL se asocia con presión arterial sistólica (β = 0.049, p = 0.0005). Mayor riesgo de hipertensión en grupo con mayor PRAL (T3 vs T1) (OR 1.45, p=0.0004) (ajustado a sexo, edad, IMC, tabaquismo, alcoholismo, función renal, entre otros). | Dietas con carga ácida elevada se asocian a mayor tensión arterial sistólica y mayor riesgo de hipertensión. |
| Resistencia a la insulina /  Diabetes | Fagherazzi G, et al.  2013  [44] | Cohorte prospectiva.  Evaluación dietética (CFC de 208 alimentos). Algoritmo para diagnóstico de diabetes mellitus 2 (DM2).  Cálculo de PRAL y NEAPestimado.  Seguimiento durante 14 años. | Dietas con mayor PRAL y NEAPestimado (C4 vs C1) se asocian a mayor riesgo de DM2 (OR 1.56, IC95% 1.29-1.90, p<0.0001 para PRAL, OR 1.57 IC95% 1.30-1.89, p<0.0001 para NEAPestimado) (ajustado a edad, IMC, tabaquismo, actividad física, energía consumida, alcoholismo, entre otros). | Dietas con alta carga ácida se asocian con un incremento en el riesgo de DM2. |
| Xu H, et al.  2014  [46] | Cohorte prospectiva.  Evaluación dietética (diario de 7 días) y de parámetros bioquímicos (sensibilidad a la insulina). Incidencia de DM2 durante 18 años de seguimiento posteriores a la realización de la evaluación dietética.  Cálculo de PRAL y NEAPestimado.  Seguimiento durante 18 años. | Se incluyeron 911 adultos.  Durante 18 años de seguimiento, se presentaron 115 casos de DM2. No se observó asociación entre NEAPestimado y PRAL con sensibilidad a la insulina ni con riesgo de DM2 (OR 0.84, IC95% 0.49-1.44, p=0.71 para PRAL, OR 0.77, IC95% 0.42-1.41, p=0.43 para NEAPestimado). | La carga ácida de la dieta no tiene relación con la sensibilidad a la insulina ni la incidencia de DM2. |
| Akter S, et al.  2016  [42] | Estudio transversal.  Evaluación dietética (CFC de 56 alimentos) y de parámetros bioquímicos (insulina y glucosa sérica). Cálculo de índice de HOMA-IR.  Cálculo de NEAPestimado y PRAL. | Se incluyeron 1 732 adultos (16-69 años) en el análisis.  Relación directa entre PRAL (p=0.045) y NEAPestimado (p=0.03) con el resultado del índice de HOMA-RI (ajustado a sexo, edad, IMC, entre otros). | Dietas con carga ácida elevada se asocian con resistencia a la insulina. |
| Akter S, et al.  2016  [47] | Cohorte prospectiva.  Evaluación dietética (CFC de 147 alimentos). Incidencia de DM2 5 posteriores a la medición basal.  Cálculo de NEAPestimado y PRAL.  Seguimiento durante 5 años. | Se incluyeron 27 809 hombres y 36 851 hombres de 45 a 75 años.  En hombres, pero no en mujeres, el PRAL (OR 1.61, IC95% 1.16-2.24, p=0.005) se asocia con un mayor riesgo de DM2 (ajustado a múltiples confusores). No se observó dicha asociación para NEAPestimado en ambos sexos. | Dietas con carga ácida elevada incrementan el riesgo de DM2 en hombres pero no en mujeres. |
| Saraf-Bank S, et al. 2017  [43] | Estudio de casos y controles.  Evaluación dietética (diario de 3 días) y bioquímica (parámetros metabólicos)  Cálculo de PRAL y NEAPestimado. | Se incluyeron a 236 mujeres embarazadas sanas y 200 mujeres con diabetes mellitus gestacional.  Se observaron mayores concentraciones de colesterol total, colesterol LDL y glucosa en las mujeres con dietas altas en PRAL (T3 vs T1). Mayor riesgo de DMG en mujeres con PRAL elevado (OR 5.25, IC95% 2.99-9.24, p<0.001) | Dietas con PRAL elevado se asocian con un incremento en el riesgo de diabetes mellitus gestacional en mujeres embarazadas. |
| Kiefte-de Jong JC, et al.  2017  [45] | Resultados de tres cohortes prospectivas.  Evaluación dietética (CFA). Cuestionario de autoinforme de DM2. | 67 433 mujeres del Nurses Health Study, 84 319 mujeres del Nurses Health Study 2 y 35 743 hombres del Health Professionals Follow-Up Study.  Mayor riesgo de DM2 en individuos con dietas altas en PRAL y NEAP (Q5 vs Q1) (OR 1.21, IC95% 1.09-1.33, p<0.0001 para NEAPestimado, OR 1.19, IC95% 1.08-1.30, p=0.0009 para PRAL) ajustado a factores de riesgo dietéticos y de diabetes. | Dietas con carga ácida elevada se asocian a un incremento en el riesgo de DM2. |
| Hígado Graso no Alcohólico | Krupp D, et al.  2012  [50] | Cohorte prospectiva.  Evaluación dietética (diario de 3 días) y de la función hepática (ALT, índice de esteatosis hepática-HSI-, índice de hígado graso – FLI-)  Cálculo de PRAL. | Se incluyeron a 82 mujeres y 63 hombres que fueron seguidos durante la adolescencia hasta la adultez.  En mujeres que seguían una dieta alta en PRAL (T3 vs T1) durante su adolescencia se observaron mayores concentraciones de ALT (p=0.02), HSI (p=0.002) y FLI (p=0.005) (ajustado a edad, consumo de fibra, de hidratos de carbono, proteína e IMC). No se observaron asociaciones en los hombres. | El consumo a largo plazo de dietas altas en carga ácida se asocia con un incremento en el riesgo de desarrollar esteatosis hepática en mujeres sanas jóvenes, pero no en hombres. |
| Chan R, et al.  2016.  [51] | Estudio transversal.  Evaluación dietética (CFC de 297 alimentos) y de la función hepática con elastografía hepática.  Cálculo de NEAPestimado y PRAL. | Se incluyeron a 793 pacientes (41.6% hombres). Se detectaron a 220 pacientes (27.7%) con hígado graso no alcohólico. Se observó mayor riesgo de hígado graso no alcohólico en pacientes con NEAPestimado elevado (OR 1.32, IC95% 1.01-1.74, p=0.049), asociación no observada para PRAL. | Dietas con carga ácida elevada, evaluada a través del NEAPestimado, incrementan el riesgo de desarrollar hígado graso no alcohólico. |
| Enfermedad Renal Crónica | Banerjee T, et al.  2014  [53] | Estudio transversal.  Evaluación dietética (recordatorio de 24 horas) y de la función renal para diagnóstico de enfermedad renal crónica (ERC) determinada por albuminuria >30 mg/g creatinina o tasa de filtrado glomerular (TFG) <60 ml/min/1.73 m2 utilizando la ecuación MDRD.  Se estimó el PRAL y NEAPestimado (PRAL + ácidos orgánicos) | Se incluyeron a 12 293 individuos (47.5% mujeres).  Dietas con NEAPestimado elevado se asocian con mayor riesgo de albuminuria (OR 1.58, IC95% 1.04-2.39, p=0.05) y de TFG disminuida (OR 1.42, IC95% 1.07-2.1, p=0.01) (ajustado a tabaquismo, diabetes, hipertensión, edad, género, consumo energético, IMC, entre otros, en pacientes sin diabetes).  En pacientes con diabetes, mayor riesgo de albuminuria (OR 1.57, IC95%1.20-2.05, p=0.04) y baja TFG (OR 1.37, IC95% 0.91-2.05, p=0.04). | Dietas con carga ácida elevada (NEAPestimado elevado) incrementan el riesgo de presentar marcadores de daño renal. |
| Rebholz CM, et al.  2015  [55] | Cohorte prospectiva.  Evaluación dietética (CFC de 66 alimentos).  Incidencia de ERC.  Cálculo de NEAPestimado y PRAL.  Seguimiento durante 21 años. | Inclusión de 15 055 adultos (55% mujeres). Se presentaron 2351 casos de ERC. Mayor incidencia de ERC en individuos con dietas altas en PRAL (Q4 vs Q1) (OR 1.13, IC95% 1.01-1.28, p=0.02) y de NEAPestimado (OR 1.14, IC95% 1.01-1.28, p=0.01) (ajustados a la edad, sexo, diagnóstico de DM2, HTA, obesidad, entre otros). | Dietas con carga acida elevadas se asocian a una mayor incidencia de ERC. |
| Banerjee T, et al.  2015  [57] | Cohorte prospectiva.  Evaluación dietética (recordatorio de 24 horas) y de la función renal para diagnóstico de ERC terminal (TFG <15 ml/min/1.73 m2 o inicio de terapia renal sustitutiva).  Cálculo de PRAL y NEAPestimado (PRAL + OA).  Media de seguimiento de 14.2 años. | Se dio seguimiento a un total de 1 486 pacientes con ERC. Se presentaron 311 casos de ERC terminal, observando un mayor riesgo en aquellos pacientes con dietas altas en NEAPestimado (T3 vs T1) (OR 3.04, IC95%1.58-5.86, p<0.05), (ajustado a albuminuria, TFG basal, ingesta de energía, proteína, diabetes, hipertensión, entre otros). | Dietas altas en carga ácida se asocian a una progresión acelerada de la enfermedad renal, incrementando la incidencia de ERC terminal. |
| Ikizler HO, et al. 2016. [58] | Estudio transversal.  Evaluación dietética (diario de alimentos de 3 días) y de parámetros bioquímicos (bicarbonato sérico y sensibilidad a la insulina).  Cálculo de NEAPestimado y PRAL | Se incluyeron 63 pacientes con ERC.  Se observó una relación inversa (p=<0.001) entre el NEAPestimado y PRAL con las concentraciones séricas de bicarbonato (ajustado a la edad, sexo, TFG, IMC, raza y uso de diuréticos). No se observó asociación con la sensibilidad a la insulina. | La carga ácida de la dieta se asocia de forma inversa con las concentraciones de bicarbonato sérico en pacientes con ERC. |
| So R, et al.  2016  [52] | Estudio transversal.  Evaluación dietética (CFC de 103 alimentos) y de la función renal para estimación de la TFG (CKD-EPI).  Calculo de NEAPestimado. | Se incluyeron 123 168 pacientes adultos. Los individuos con dietas altas en carga ácida tienen mayor riesgo de hiperfiltración glomerular (OR 1.19, IC95% 1.04-1.35, p= 0.037 en hombres y OR 1.16, IC95% 1.06-1.27, p= 0.001 en mujeres) (ajustado a posibles confusores). | La carga ácida de la dieta se asocia a mayor prevalencia de hiperfiltración glomerular en hombres y mujeres. |
| Ko BJ, et al.  2017  [56] | Estudio transversal.  Evaluación dietética (CFC de 103 alimentos) y de la función renal para estimación de la TFG (CKD-EPI).  Calculo de NEAPestimado. | Se incluyeron a 1 369 adultos mayores.  Se observó mayor prevalencia de ERC en pacientes con dietas altas en NEAPestimado (C4 vs C1) (OR 2.30, IC95% 1.16-4.60, p=0.019) (ajustado a edad, sexo, consumo energético y de sodio, IMC, entre otros). | Dietas altas en carga ácida están asociadas a una mayor prevalencia de ERC en adultos mayores. |
| Banerjee T, et al.  2018  [54] | Estudio transversal.  Evaluación dietética (CFC) y de la función renal para estimación de la TFG (CKD-EPI) y la presencia de albuminuria con recolección de orina de 24 horas.  Calculo de PRAL. | Se incluyeron 3 257 individuos afroamericanos, en quienes se observó mayor prevalencia de TFG disminuida en aquellos con dietas altas en carga acida (T3 vs T1) (OR 2.82, IC95% 1.40-4.75, p=0.02) (ajustado a edad, género, IMC, diabetes, hipertensión, entre otros).  Tras analizar un total de 1013 individuos que contaban con recolección de orina de 24 horas, se observó mayor albuminuria en aquellos con dietas altas en PRAL (OR 1.12, IC95% 1.02-1.70). | Dietas altas en carga ácida se asocian a una mayor prevalencia de albuminuria y TFG disminuida en adultos afroamericano. |
| Litiasis Renal | Trincheri A, et al.  2013  [62] | Estudio de casos y controles.  Evaluación dietética (recordatorio de 24 horas y CFC de grupos alimentarios).  Cálculo de PRAL. | Se incluyeron 123 pacientes con litos renales de calcio-oxalato y 123 controles.  PRAL elevado (C4 vs C1) se asocia con un mayor riesgo de desarrollo de litiasis renal (OR 2.5, IC95% 1.21-5.17, p=<0.05). | Dietas altas en carga acida incrementan el riesgo de formación de litos renales. |
| Ferraro PM, et al.  2016  [63] | Resultados de tres cohortes prospectivas.  Evaluación dietética (CFC). Cuestionario de autoinforme de litiasis renal.  Cálculo de NEAPestimado. | Se utilizaron los datos de 193 676 pacientes; 60 128 mujeres del Nurses Health Study, 90 629 mujeres del Nurses Health Study II y 42 919 hombres del Health Professionals Follow-Up Study.  Se observó una asociación positiva entre NEAPestimado e incidencia de litos renales (OR 1.22, IC95% 1.05-1.41, p<0.01) (ajustado a edad, IMC y uso de tiazidas). | Dietas con carga ácida elevada (NEAPestimado elevado) se asocian a mayor riesgo de incidencia de litiasis renal. |
| Enfermedades Cardiovasculares | Han E, et al. 2016  [64] | Cohorte retrospectiva.  Evaluación dietética (recordatorio de 24 horas) y del riesgo cardiovascular a 10 años utilizando la herramienta ASCVD y Framingham.  Se estimó el PRAL y NEAPestimado (PRAL + ácidos orgánicos) | Se incluyeron 11 601 pacientes provenientes del Korean National Health and Nutrition Surveys (KHANES IV y V).  Individuos con PRAL elevado (T3 vs T1) tienen mayor tensión arterial, triglicéridos y mayor prevalencia de síndrome metabólico.  Dietas con PRAL elevado se asocian a mayor riesgo cardiovascular utilizando la escala ASCVD (OR 1.20, IC95% 1.01-1.43, p=<0.05) y Framingham (OR 1.19, IC95% 1.01-1.41, p=<0.05) (ajustado a edad, sexo, ejercicio, historia familiar de enfermedades cardiovasculares, DM, hipertensión, colesterol LDL, TFG, entre otros). | Dietas con carga ácida elevada (PRAL elevado) se asocian a mayor riesgo cardiovascular, independientemente de los factores cardiovasculares presentes. |
| Mortalidad | Huston HK, 2015.  [66] | Cohorte prospectiva.  Evaluación dietética (recordatorio de 24 horas).  La información se recolectó entre 1988 y 1994. Se consultó la información de mortalidad de cada participante registrada al 31 de diciembre del 2000.  Cálculo de NEAPestimado. | Se incluyeron 16 906 pacientes.  Los individuos con dietas altas en NEAPestimado (C4 vs C1) presentaron una menor mortalidad (OR 0.75, IC95% 0.62-0.90, p=<0.05) (ajustado a TFG, albúmina urinaria, bicarbonato sérico, edad, género, IMC, historial médico, entre otras). | Dietas altas en carga ácida (NEAPestimado elevado) se asocian con menor riesgo de mortalidad. |
| Akter S, et al.  2017  [67] | Cohorte prospectiva.  Evaluación dietética (CFC de 147 alimentos). Mortalidad 5-10 años posteriores a la medición basal.  Cálculo de NEAPestimado y PRAL. | Se incluyeron a 92 478 japoneses (46.2% hombres).  Se observó una asociación entre dietas con PRAL elevado (C4 vs C1) y mortalidad general (OR 1.13, IC95% 1.07-1.18, p<0.001), mortalidad cardiovascular (OR 1.16, IC95% 1.06-1.28, p=0.002). El NEAPestimado se asoció también con mortalidad general (OR 1.12, IC95% 1.06-1.17, p<0.001) y cardiovascular (OR 1.17, IC95% 1.06-1.29, p<0.001). | Dietas con carga ácida elevada (PRAL y NEAPestimado elevados) se asocian a un incremento en el riesgo de mortalidad en general, así como a una mayor mortalidad de causas cardiovasculares. |

NEAP: producción neta de ácido, PRAL: Carga ácida potencial renal, DXA: Absorciometría con rayos x de doble energía, T: Tercil, C: Cuartil, Q: Quintil, D: Decil, OR: Odds Ratio, IC: Intervalo de confianza, CFC: Cuestionario de frecuencia de consumo, FLI: Índice de hígado graso, HSI: Índice de esteatosis hepática, TFG: Tasa de filtrado glomerular, IMC: Índice de masa corporal, DM2: Diabetes mellitus 2, ERC: Enfermedad renal crónica
